# Supplementary material
Source: PubMed Central journal article supplement (PMC5915903)
Supplement: NIHMS957282-supplement-5.pdf [file NIHMS957282-supplement-5.pdf]

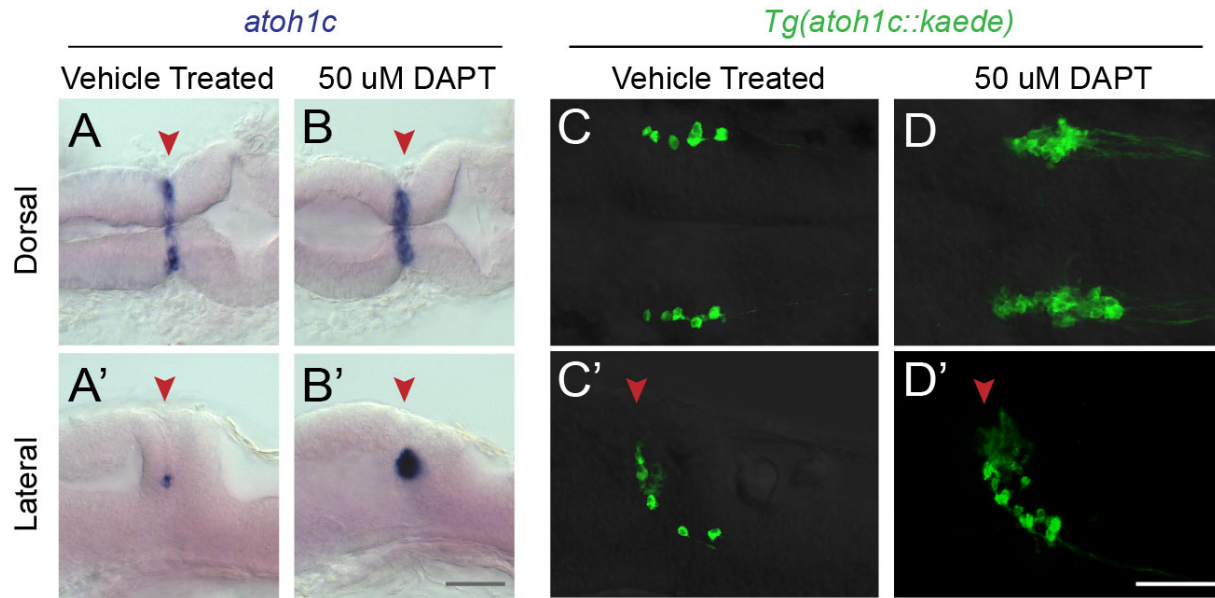

**Supplemental Figure 1. Notch-mediated lateral inhibition of *atoh1c* MHB domain.**

Pharmacological inhibition of Notch signaling with  $\gamma$ -secretase inhibitor DAPT blocks restriction of *atoh1c* expression domain (B) resulting in an overproduction of *Tg(atoh1c::kaede)*+ neurons (D) compared to stage-matched vehicle treated control embryos (A, C). 22 hpf embryos (A,B) treated for 18 hours or 30 hpf embryos (C,D) treated for 26 hours in orientations as indicated. Red arrowheads indicate location of MHB. Scale bars: 50  $\mu$ m.
